# Supplementary material for: Genome survey of resistance gene analogs in sugarcane: genomic features and differential expression of the innate immune system from a smut-resistant genotype
Source: PubMed Central journal article supplement (PMC6836459; doi:10.1186/s12864-019-6207-y), 2019-11-06
Supplement: 12864_2019_6207_MOESM3_ESM.pdf [file 12864_2019_6207_MOESM3_ESM.pdf]

**Additional file 3**  
**Supplementary Data**

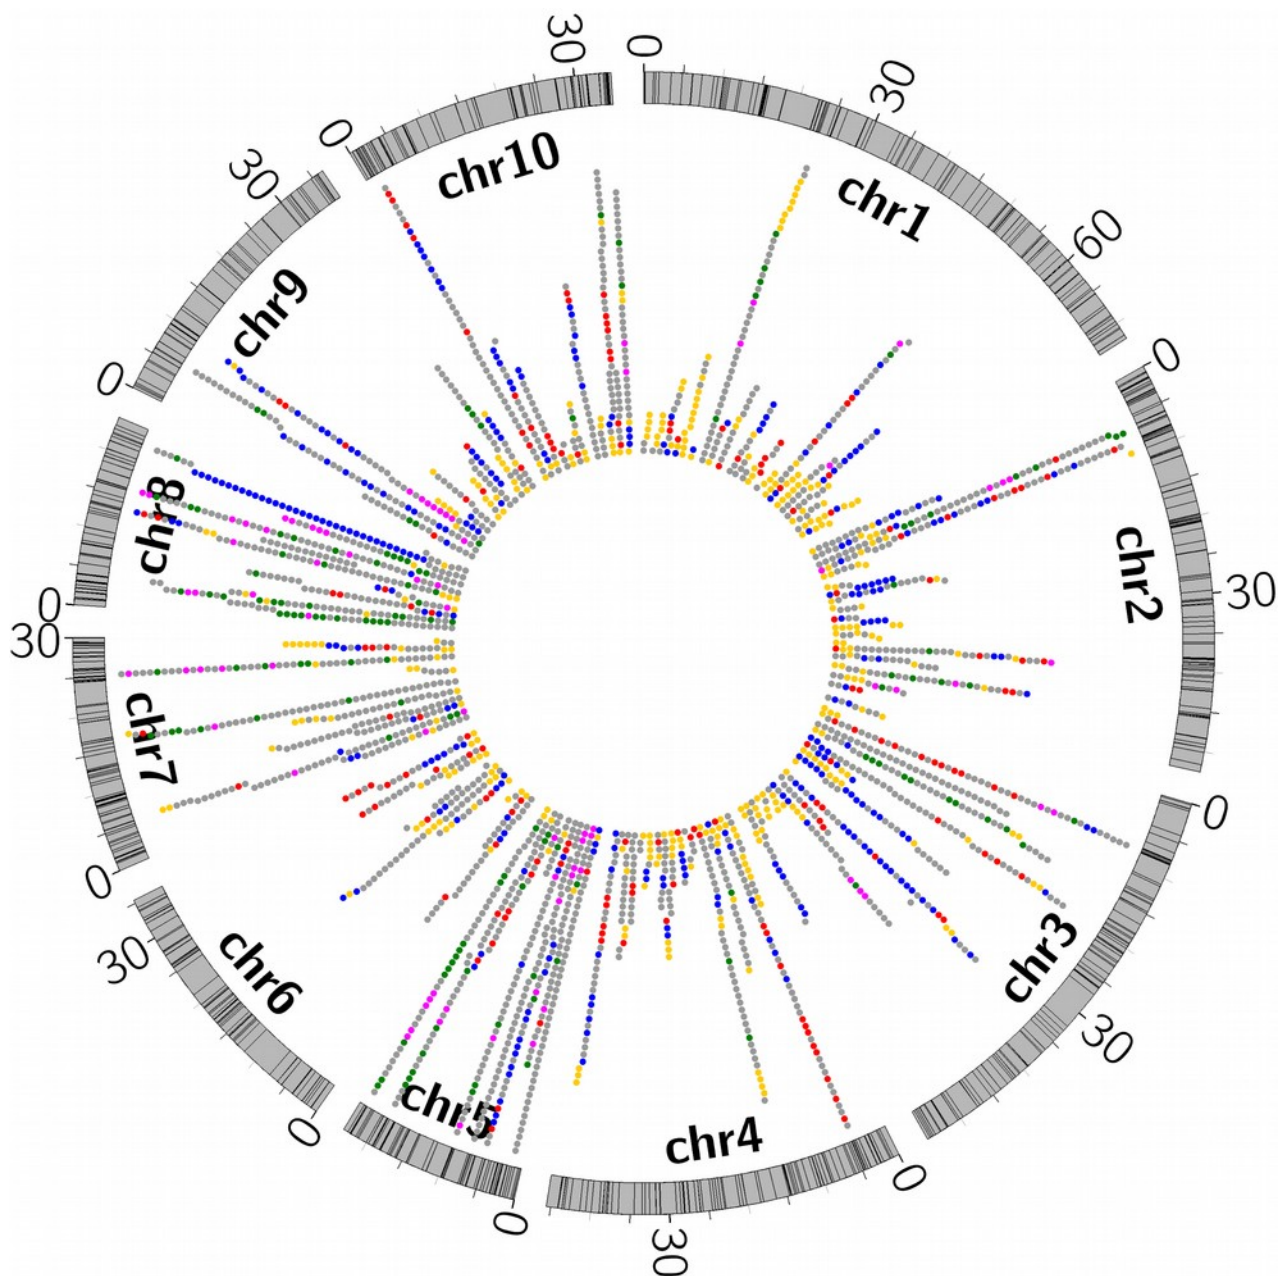

**Supplementary Figure S1.** Distribution of RGA candidates predicted from COMPGG *de novo* unique transcript sequences along 10 chromosomes of *Sorghum bicolor* genome. The ring indicate the chromosomes in Mbp. Traces in chromosomes indicate RGAs positions. Colored dots indicate RGAs accordingly to subgroup: RLK: blue; RLP: red; CNL: green; TM-CC: yellow; CN: purple; Other variants: grey. Figure Swas prepared using the software Circos.

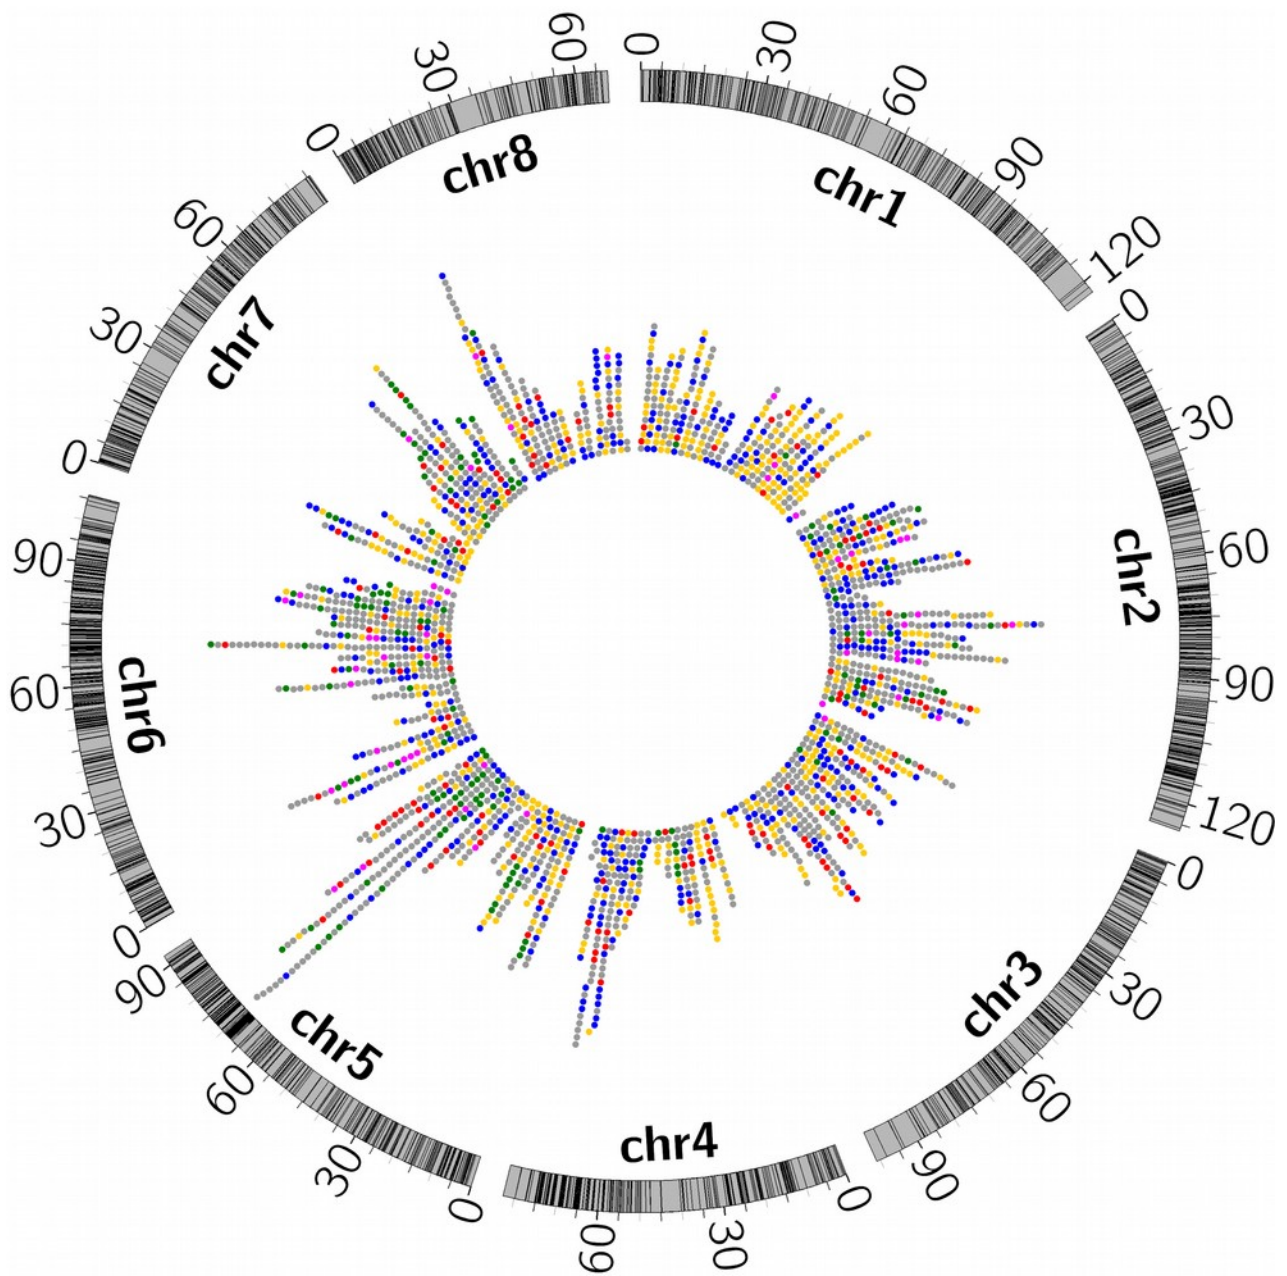

**Supplementary Figure S2.** Distribution of RGA candidates predicted from AP85-441 *S. spontaneum* along 10 chromosomes of *Sorghum bicolor* genome. The ring indicate the chromosomes in Mbp. Traces in chromosomes indicate RGAs positions. Colored dots indicate RGAs accordingly to subgroup: RLK: blue; RLP: red; CNL: green; TM-CC: yellow; CN: purple; Other variants: grey. Figure Swas prepared using the software Circos.

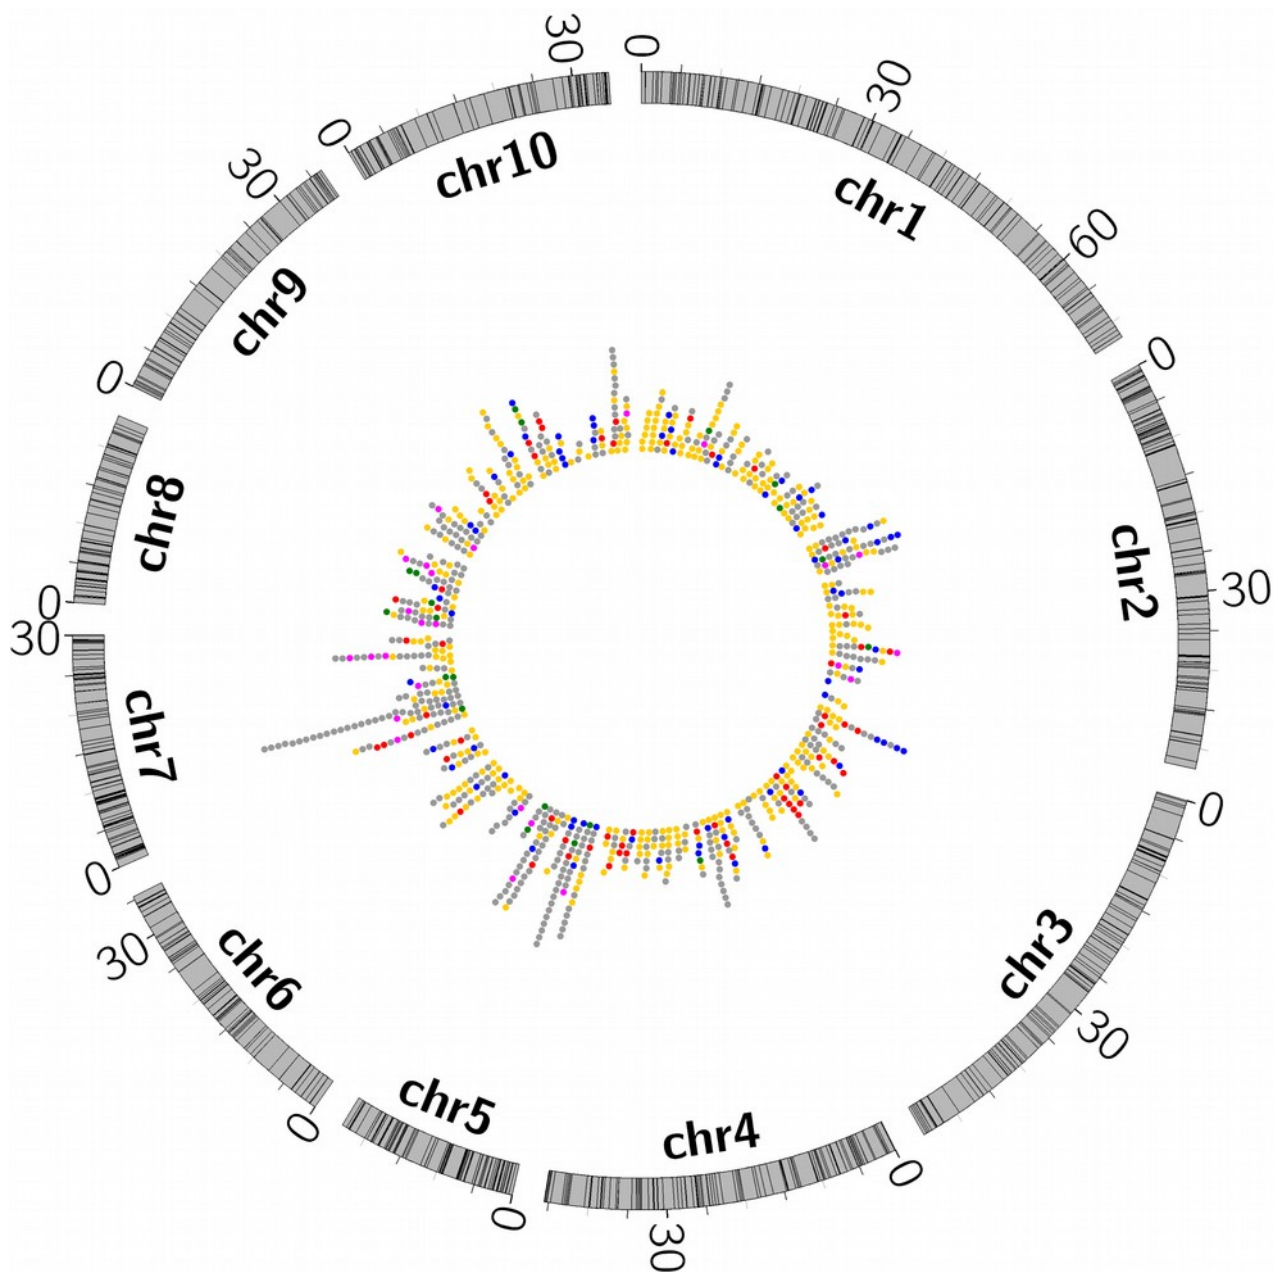

**Supplementary Figure S3.** Distribution of RGA candidates predicted from R570 sugarcane cultivar monoplod genome along 10 chromosomes of *Sorghum bicolor* genome. The ring indicate the chromosomes in Mbp. Traces in chromosomes indicate RGAs positions. Colored dots indicate RGAs accordingly to subgroup: RLK: blue; RLP: red; CNL: green; TM-CC: yellow; CN: purple; Other variants: grey. Figure Swas prepared using the software Circos.



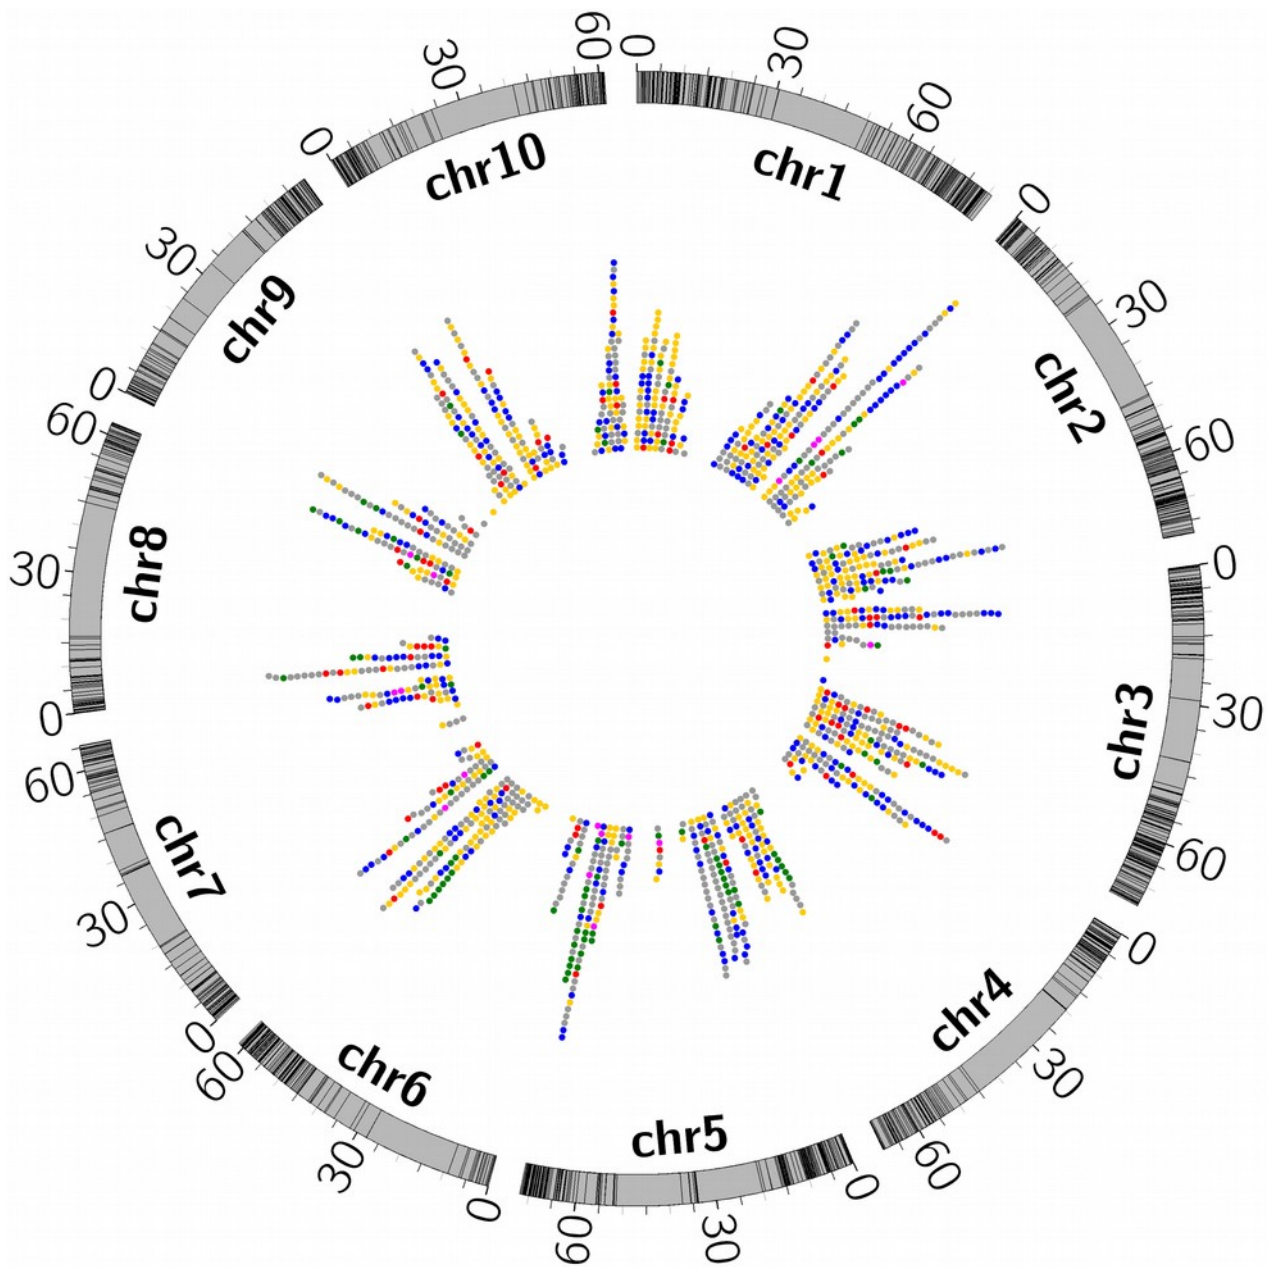

**Supplementary Figure S4.** Distribution of RGA candidates predicted from *Sorghum bicolor* along 10 chromosomes of its genome. The ring indicate the chromosomes in Mbp. Traces in chromosomes indicate RGAs positions. Colored dots indicate RGAs accordingly to subgroup: RLK: blue; RLP: red; CNL: green; TM-CC: yellow; CN: purple; Other variants: grey. Figure Swas prepared using the software Circos.

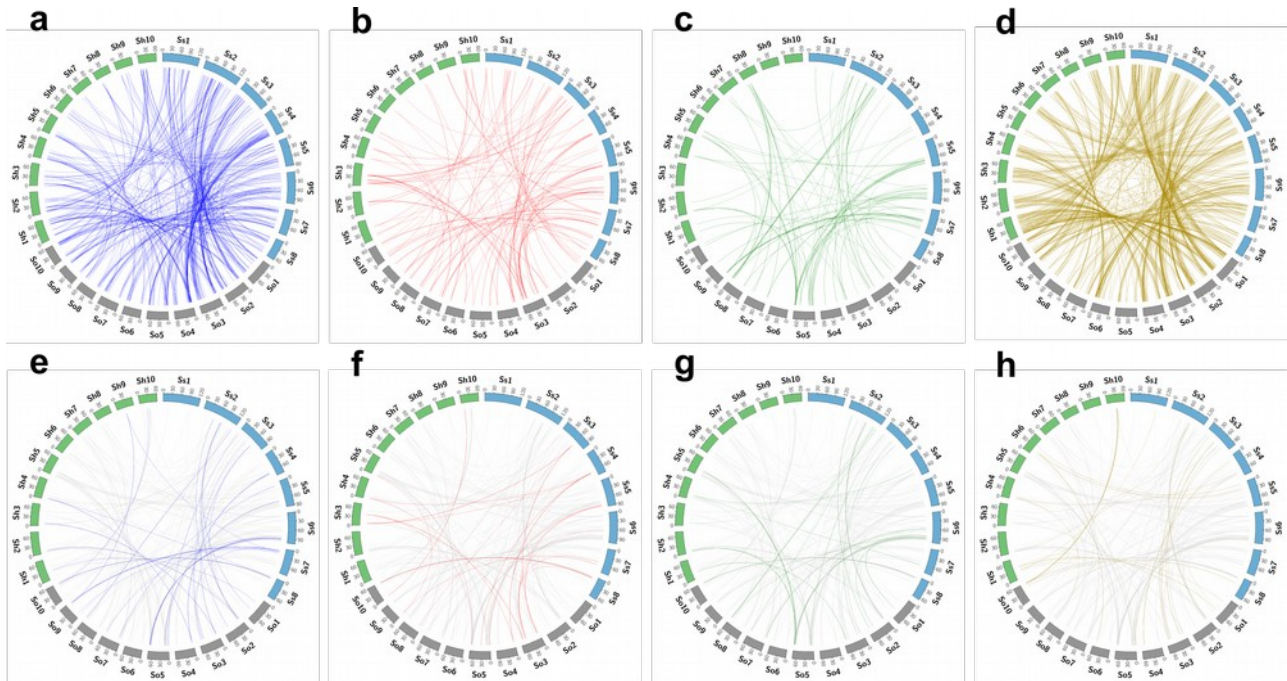

**Supplementary Figure S5.** Shared synteny view of the four most frequent RGA subgroups along the chromosomes of three references of sugarcane. All predicted RGAs in subgroups: **a** RLK. **b** RLP. **c** CNL. **d** TM-CC. All predicted RGAs arranged in clusters with subgroups highlighted in: **e** RLK. **f** RLP. **g** CNL. **h** TM-CC. Links represents reciprocal best-hit genes among references obtained by BLASTp searches (e-value <  $1e^{-20}$ , identity > 40, ranked by query coverage). Outer circle represents the chromosomes, with scale showing coordinates in base pairs, and colored accordingly: AP85-441: blue; *S. bicolor*: grey; and R570: green.

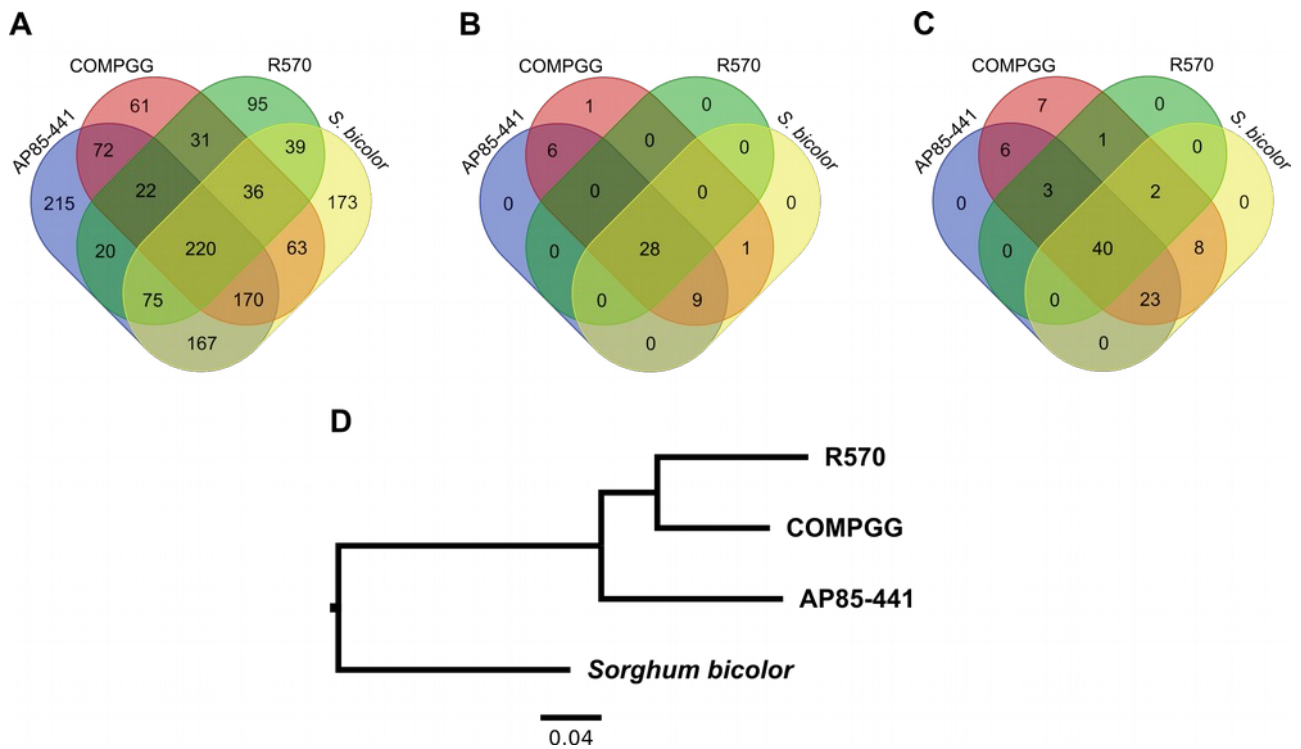

**Supplementary Figure S6.** RGA ortholog relationships among four references of sugarcane. Venn diagrams showing the number of orthogroups harboring: **A**, RGAs among the four focal references for sugarcane; **B**, RGADE predicted within sugarcane IAC66-6 cultivar; and **C**, RGADE predicted within sugarcane SP80-3280 cultivar. Orthogroups were predicted using OrthoMCL with BLASTp cutoff  $e^{-05}$ . Figure Swas produced with Draw Venn Diagram web application (<http://bioinformatics.psb.ugent.be/webtools/Venn/>). **D**, Phylogenetic tree showing the relationships among four references of sugarcane obtained from 220 concatenated RGA loci found shared among the four focal sugarcane references used in this study. Tree was obtained having the multiple-alignment of protein sequences performed by Muscle as input to FastTree software and the Le-Gascuel model of amino acid evolution.

## Data collection

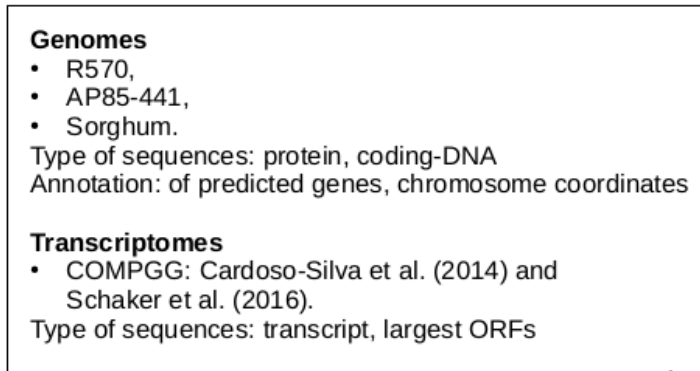

## RGA predictions

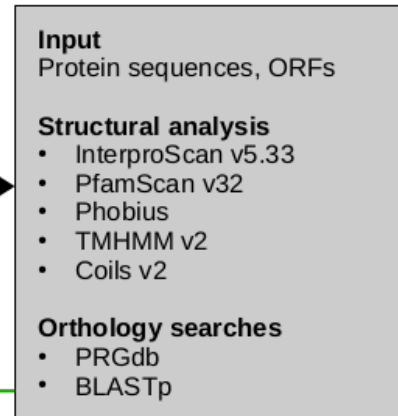

## Orthology searches

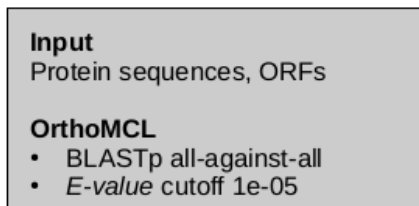

## Shared synteny

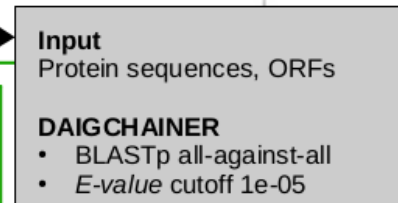

## Sugarcane transcriptomes obtention

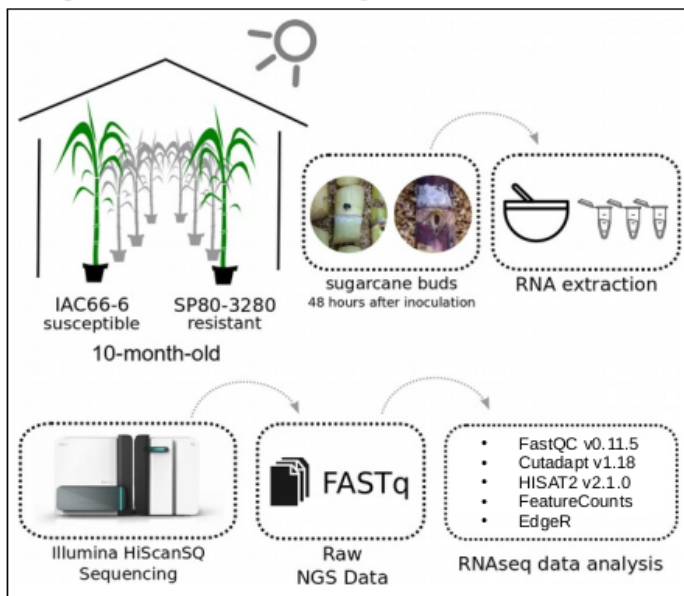

## RGA clusters

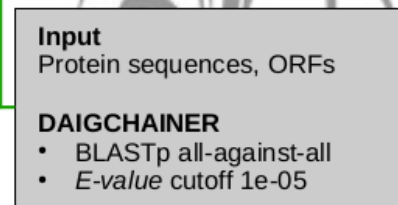

## RGADE phylogeny

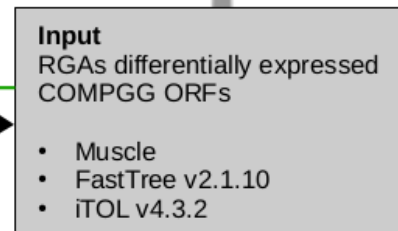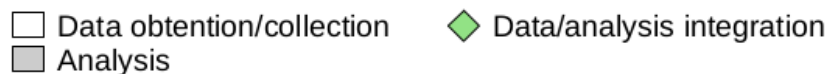

**Supplementary Figure S7.** Experimental design used in this work. Black arrows indicate the overflow, whereas green arrows indicate how the generated data was integrated for genomic comparisons.



**Supplementary Table S1.** General RNAseq data statistics used in this study.

| Biological replicate                  | Number of raw paired-end reads | Number of paired-end reads after CutAdapt filtering | Pre-processed reads (%) |
|---------------------------------------|--------------------------------|-----------------------------------------------------|-------------------------|
| IAC_48h_control_R1_C1_S10_L002_R1_001 | 13,321,602                     | 13,008,288                                          | 97.65                   |
| IAC_48h_control_R2_C2_S11_L002_R1_001 | 9,805,246                      | 9,629,952                                           | 98.21                   |
| IAC_48h_control_R3_C3_S12_L002_R1_001 | 9,153,047                      | 8,968,846                                           | 97.99                   |
| IAC_48h_inoc_R1_C4_S13_L002_R1_001    | 2,724,136                      | 2,594,261                                           | 95.23                   |
| IAC_48h_inoc_R2_C5_S14_L002_R1_001    | 7,495,174                      | 7,297,868                                           | 97.37                   |
| IAC_48h_inoc_R3_C6_S15_L002_R1_001    | 8,252,851                      | 8,112,783                                           | 98.3                    |
| SP_48h_control_R1_C7_S16_L002_R1_001  | 7,857,985                      | 7,631,342                                           | 97.12                   |
| SP_48h_control_R2_C8_S17_L002_R1_001  | 6,786,732                      | 6,604,681                                           | 97.32                   |
| SP_48h_control_R3_C9_S18_L002_R1_001  | 10,051,357                     | 9,767,445                                           | 97.18                   |
| SP_48h_inoc_R1_C10_S19_L002_R1_001    | 9,062,757                      | 8,896,637                                           | 98.17                   |
| SP_48h_inoc_R2_C11_S20_L002_R1_001    | 11,529,523                     | 11,262,410                                          | 97.68                   |
| SP_48h_inoc_R3_C12_S21_L002_R1_001    | 9,929,794                      | 9,747,096                                           | 98.16                   |

**Supplementary Table S2.** Overview of the proportion of predicted RGAs and RGADEs in the chromosomes in relation to the total of correspondent predictions within each of three sugarcane genome references.

| Chr | R570      |               |                 | AP85-441  |               |                 | <i>S. bicolor</i> |               |                 |
|-----|-----------|---------------|-----------------|-----------|---------------|-----------------|-------------------|---------------|-----------------|
|     | Total RGA | IAC66-6 RGADE | SP80-3280 RGADE | Total RGA | IAC66-6 RGADE | SP80-3280 RGADE | Total RGA         | IAC66-6 RGADE | SP80-3280 RGADE |
| 1   | 0.14      | 0.07*         | 0.07**          | 0.12      | 0.08*         | 0.08**          | 0.13              | 0.07**        | 0.08**          |
| 2   | 0.11      | 0.09          | 0.11            | 0.17      | 0.14          | 0.17            | 0.14              | 0.12          | 0.13            |
| 3   | 0.11      | 0.13          | 0.12            | 0.11      | 0.10          | 0.07**          | 0.12              | 0.12          | 0.09            |
| 4   | 0.11      | 0.12          | 0.12            | 0.09      | 0.09          | 0.12            | 0.08              | 0.08          | 0.09            |
| 5   | 0.10      | 0.19**        | 0.16*           | 0.15      | 0.22**        | 0.19*           | 0.12              | 0.24**        | 0.19**          |
| 6   | 0.08      | 0.07          | 0.06            | 0.14      | 0.14          | 0.15            | 0.07              | 0.04*         | 0.05            |
| 7   | 0.10      | 0.06          | 0.08            | 0.10      | 0.12          | 0.11            | 0.07              | 0.05          | 0.07            |
| 8   | 0.06      | 0.09          | 0.10            | 0.07      | 0.07          | 0.07            | 0.07              | 0.12**        | 0.11            |
| 9   | 0.07      | 0.01*         | 0.06            |           |               |                 | 0.07              | 0.06          | 0.06            |
| 10  | 0.08      | 0.12          | 0.08            |           |               |                 | 0.08              | 0.06          | 0.07            |

Proportions in relation to the total are different and significant at the level of  $P < 0.01$  (\*\*) or  $P < 0.05$  (\*) by the Fisher's exact test.
